# Supplementary material for: Estimated Deaths Attributable to Excessive Alcohol Use Among US Adults Aged 20 to 64 Years, 2015 to 2019
Source: PubMed Central journal article supplement (PMC9627409; doi:10.1001/jamanetworkopen.2022.39485), 2022-11-01
Supplement: jamanetwopen-e2239485-s001.pdf [file jamanetwopen-e2239485-s001.pdf]

## Supplementary Online Content

Esser MB, Leung G, Sherk A, et al. Estimated deaths attributable to excessive alcohol use among US adults aged 20 to 64 years, 2015 to 2019. *JAMA Netw Open*. 2022;5(11):e2239485. doi:10.1001/jamanetworkopen.2022.39485

**eTable 1.** *ICD-10* Codes and Alcohol-Attributable Fraction Information by Causes of Death in the Alcohol-Related Disease Impact Application

**eTable 2.** Adjusted Prevalence of US Mean Daily Alcohol Consumption by Level of Consumption and Age Group

**eReferences**

This supplementary material has been provided by the authors to give readers additional information about their work.

**eTable 1.** ICD-10 Codes and Alcohol-Attributable Fraction Information by Causes of Death in the Alcohol-Related Disease Impact Application

| Cause of death                                        | ICD-10 codes                            | AAF information                                                                                                                                                                                                                                                                                                                                                                                                                                                      |
|-------------------------------------------------------|-----------------------------------------|----------------------------------------------------------------------------------------------------------------------------------------------------------------------------------------------------------------------------------------------------------------------------------------------------------------------------------------------------------------------------------------------------------------------------------------------------------------------|
| <b>Chronic conditions: Direct AAF<sup>a</sup></b>     |                                         |                                                                                                                                                                                                                                                                                                                                                                                                                                                                      |
| Alcoholic psychosis                                   | F10.3-F10.9                             | AAF = 1.0. No estimation required.                                                                                                                                                                                                                                                                                                                                                                                                                                   |
| Alcohol abuse                                         | F10.0, F10.1                            | AAF = 1.0. No estimation required.                                                                                                                                                                                                                                                                                                                                                                                                                                   |
| Alcohol dependence syndrome                           | F10.2                                   | AAF = 1.0. No estimation required.                                                                                                                                                                                                                                                                                                                                                                                                                                   |
| Alcohol polyneuropathy                                | G62.1                                   | AAF = 1.0. No estimation required.                                                                                                                                                                                                                                                                                                                                                                                                                                   |
| Degeneration of nervous system due to alcohol         | G31.2                                   | AAF = 1.0. No estimation required.                                                                                                                                                                                                                                                                                                                                                                                                                                   |
| Alcoholic myopathy                                    | G72.1                                   | AAF = 1.0. No estimation required.                                                                                                                                                                                                                                                                                                                                                                                                                                   |
| Alcohol cardiomyopathy                                | I42.6                                   | AAF = 1.0. No estimation required.                                                                                                                                                                                                                                                                                                                                                                                                                                   |
| Alcoholic gastritis                                   | K29.2                                   | AAF = 1.0. No estimation required.                                                                                                                                                                                                                                                                                                                                                                                                                                   |
| Alcoholic liver disease                               | K70.0-K70.4, K70.9                      | AAF = 1.0. No estimation required.                                                                                                                                                                                                                                                                                                                                                                                                                                   |
| Alcohol-induced acute pancreatitis                    | K85.2                                   | AAF = 1.0. No estimation required.                                                                                                                                                                                                                                                                                                                                                                                                                                   |
| Alcohol-induced chronic pancreatitis                  | K86.0                                   | AAF = 1.0. No estimation required.                                                                                                                                                                                                                                                                                                                                                                                                                                   |
| Fetal alcohol syndrome                                | Q86.0                                   | AAF = 1.0. No estimation required.                                                                                                                                                                                                                                                                                                                                                                                                                                   |
| Fetus and newborn affected by maternal use of alcohol | P04.3                                   | AAF = 1.0. No estimation required.                                                                                                                                                                                                                                                                                                                                                                                                                                   |
| Esophageal varices                                    | I85                                     | AAF = 0.68. AAF calculated by summing all alcoholic liver cirrhosis deaths and 40% of the unspecified liver cirrhosis deaths <sup>1</sup> and chronic hepatitis not elsewhere classified, and then dividing that by the sum of total cirrhosis deaths (that is, all alcoholic liver cirrhosis deaths; all unspecified liver cirrhosis deaths; and all chronic hepatitis not elsewhere classified deaths).<br>Source AAF based on: Parrish et al. (1993) <sup>1</sup> |
| Gastroesophageal hemorrhage                           | K22.6                                   | AAF = 0.47.<br>AAF source: English et al. (1995) <sup>2</sup>                                                                                                                                                                                                                                                                                                                                                                                                        |
| Liver cirrhosis, unspecified                          | K74.0-K74.2, K74.6, K76.0, K76.7, K76.9 | AAF = 0.40.<br>AAF source: Parrish et al. (1993) <sup>1</sup>                                                                                                                                                                                                                                                                                                                                                                                                        |
| Portal hypertension                                   | K76.6                                   | AAF = 0.68. AAF calculated by summing all alcoholic liver cirrhosis deaths and 40% of the unspecified liver cirrhosis deaths <sup>1</sup> and chronic hepatitis not elsewhere classified, and then dividing that by the sum of total cirrhosis deaths (that is, all alcoholic liver cirrhosis deaths; all unspecified liver cirrhosis deaths; and all chronic hepatitis not elsewhere classified deaths).<br>Source AAF based on: Parrish et al. (1993) <sup>1</sup> |
| <b>Chronic conditions: Indirect AAF<sup>b</sup></b>   |                                         |                                                                                                                                                                                                                                                                                                                                                                                                                                                                      |
| Atrial fibrillation                                   | I48                                     | Relative risk source: Samokhvalov et al. (2010a) <sup>3</sup>                                                                                                                                                                                                                                                                                                                                                                                                        |
| Cancer, breast (females only)                         | C50                                     | Relative risk source: Bagnardi et al. (2015) <sup>4</sup>                                                                                                                                                                                                                                                                                                                                                                                                            |
| Cancer, colorectal                                    | C18, C20                                | Relative risk source: Bagnardi et al. (2015) <sup>4</sup>                                                                                                                                                                                                                                                                                                                                                                                                            |
| Cancer, esophageal                                    | C15                                     | Deaths calculated for the proportion of esophageal cancer deaths due to squamous                                                                                                                                                                                                                                                                                                                                                                                     |

|                                                    |                                   |                                                                                                                                                                                                                                                                                                                                                         |
|----------------------------------------------------|-----------------------------------|---------------------------------------------------------------------------------------------------------------------------------------------------------------------------------------------------------------------------------------------------------------------------------------------------------------------------------------------------------|
|                                                    |                                   | cell carcinoma only, based on the Surveillance, Epidemiology, and End Results data in 18 states (SEER18).<br>Relative risk source: Bagnardi et al. (2015) <sup>4</sup>                                                                                                                                                                                  |
| Cancer, laryngeal                                  | C32                               | Relative risk source: Bagnardi et al. (2015) <sup>4</sup>                                                                                                                                                                                                                                                                                               |
| Cancer, liver                                      | C22                               | Relative risk source: Bagnardi et al. (2015) <sup>4</sup>                                                                                                                                                                                                                                                                                               |
| Cancer, oral cavity and pharynx                    | C01-C06, C09-C10, C12-C14         | Relative risk source: Bagnardi et al. (2015) <sup>4</sup>                                                                                                                                                                                                                                                                                               |
| Cancer, pancreatic                                 | C25                               | Deaths among people consuming high levels of alcohol only.<br>Relative risk source: Bagnardi et al. (2015) <sup>4</sup>                                                                                                                                                                                                                                 |
| Cancer, prostate (males only)                      | C61                               | AAF source: Bagnardi et al. (2015) <sup>4</sup>                                                                                                                                                                                                                                                                                                         |
| Cancer, stomach                                    | C16                               | Deaths among people consuming high levels of alcohol only.<br>Relative risk source: Bagnardi et al. (2015) <sup>4</sup>                                                                                                                                                                                                                                 |
| Chronic hepatitis                                  | K73                               | Relative risk source: Corrao et al. (1999) <sup>5</sup>                                                                                                                                                                                                                                                                                                 |
| Coronary heart disease                             | I20-I25                           | Relative risk source: Zhao et al. (2017) <sup>6</sup>                                                                                                                                                                                                                                                                                                   |
| Gallbladder disease                                | K80, K81, K83                     | Relative risk source: English et al. (1995) <sup>2</sup>                                                                                                                                                                                                                                                                                                |
| Hypertension                                       | I10-I13, I15                      | Relative risk source: Taylor et al. (2009) <sup>7</sup>                                                                                                                                                                                                                                                                                                 |
| Infant death, low birth weight                     | P05.0, P07.0, P07.1               | Alcohol consumption prevalence estimates calculated among females aged 18 to 44 years only.<br>Relative risk source: Patra et al. (2011) <sup>8</sup>                                                                                                                                                                                                   |
| Infant death, preterm birth                        | P07.2, P07.3                      | Alcohol consumption prevalence estimates calculated among females aged 18 to 44 years only.<br>Relative risk source: Patra et al. (2011) <sup>8</sup>                                                                                                                                                                                                   |
| Infant death, small for gestational age            | P05.1                             | Alcohol consumption prevalence estimates calculated among females aged 18 to 44 years only.<br>Relative risk source: Patra et al. (2011) <sup>8</sup>                                                                                                                                                                                                   |
| Pancreatitis, acute                                | K85.0, K85.1, K85.3, K85.8, K85.9 | Data were not available to determine the relative risk at the various levels of alcohol consumption; the AAF for acute pancreatitis for excessive consumption was calculated using the single relative risk estimate for both the medium and high mean daily alcohol consumption levels.<br>Relative risk source: Alsamarrai et al. (2014) <sup>9</sup> |
| Pancreatitis, chronic                              | K86.1                             | Relative risk source: Corrao et al. (2004) <sup>10</sup>                                                                                                                                                                                                                                                                                                |
| Pneumonia                                          | J12-J16, J18                      | Deaths from pneumonia were included for people aged 20 to 64 years only due to the high number of deaths from pneumonia among people aged 65 years and older that are not alcohol-related and the lack of relative risks that differ by age.<br>Relative risk source: Samokhvalov et al. (2010b) <sup>11</sup>                                          |
| Stroke, ischemic                                   | G45, I63, I65-I67, I69.3          | Relative risk source: Patra et al. (2010) <sup>12</sup>                                                                                                                                                                                                                                                                                                 |
| Stroke, hemorrhagic                                | I60-I62, I69.0-I69.2              | Relative risk source: Patra et al. (2010) <sup>12</sup>                                                                                                                                                                                                                                                                                                 |
| Unprovoked seizures, epilepsy, or seizure disorder | G40, G41, R56.8                   | Relative risk source: Samokhvalov et al. (2010c) <sup>13</sup>                                                                                                                                                                                                                                                                                          |

| <b>Acute conditions: Direct AAF<sup>a</sup></b> |                                                                                                                                                                                                                            |                                                                                                                                                                                                                                                                                             |
|-------------------------------------------------|----------------------------------------------------------------------------------------------------------------------------------------------------------------------------------------------------------------------------|---------------------------------------------------------------------------------------------------------------------------------------------------------------------------------------------------------------------------------------------------------------------------------------------|
| Alcohol poisoning                               | X45, Y15                                                                                                                                                                                                                   | AAF = 1.0. No estimation required.                                                                                                                                                                                                                                                          |
| Suicide by and exposure to alcohol              | X65                                                                                                                                                                                                                        | AAF = 1.0. No estimation required.                                                                                                                                                                                                                                                          |
| Air-space transport                             | V95-V97                                                                                                                                                                                                                    | AAF = 0.18.<br>AAF source: Smith et al. (1999) <sup>14</sup>                                                                                                                                                                                                                                |
| Aspiration                                      | W78-W79                                                                                                                                                                                                                    | AAF = 0.18.<br>AAF source: Smith et al. (1999) <sup>14</sup>                                                                                                                                                                                                                                |
| Child maltreatment                              | X85-X99, Y00-Y09, Y87.1                                                                                                                                                                                                    | AAF = 0.16.<br>Deaths among children aged 0 to 14 years.<br>AAF source: English et al. (1995) <sup>2</sup>                                                                                                                                                                                  |
| Drowning injuries                               | W65-W70, W73, W74, Y21                                                                                                                                                                                                     | AAF = 0.34.<br>AAF source: Smith et al. (1999) <sup>14</sup>                                                                                                                                                                                                                                |
| Fall injuries                                   | W00-W19, Y30                                                                                                                                                                                                               | AAF = 0.32.<br>Deaths from falls were included for people aged 15 to 69 years only due to the high number of deaths from falls among persons aged 70 years and older that are not alcohol-related and the lack of AAFs that differ by age.<br>AAF source: Smith et al. (1999) <sup>14</sup> |
| Fire injuries                                   | X00-X06, X08, X09, Y26                                                                                                                                                                                                     | AAF = 0.42.<br>AAF source: Smith et al. (1999) <sup>14</sup>                                                                                                                                                                                                                                |
| Firearm injuries                                | W32-W34, Y22-Y24                                                                                                                                                                                                           | AAF = 0.18.<br>AAF source: CDC National Violent Death Reporting System, 2015 <sup>15</sup>                                                                                                                                                                                                  |
| Homicide                                        | X85-X99, Y00-Y09, Y87.1                                                                                                                                                                                                    | AAF = 0.47. The AAF is from a meta-analysis that systematically reviewed studies that measured the blood alcohol levels of people who caused the crime (i.e., perpetrators) and not just the blood alcohol level of victims.<br>AAF source: English et al. (1995) <sup>2</sup>              |
| Hypothermia                                     | X31                                                                                                                                                                                                                        | AAF = 0.41.<br>AAF source: Smith et al. (1999) <sup>14</sup>                                                                                                                                                                                                                                |
| Motor-vehicle nontraffic crashes                | V02.0, V03.0, V04.0, V09.0, V12-V14(.0-.2), V19.0-V19.2, V20-V28(.0-.2), V29.0-V29.3, V30-V39(.0-.3), V40-V49(.0-.3), V50-V59(.0-.3), V60-V69(.0-.3), V70-V79(.0-.3), V81.0, V82.0, V83-V86(.4-.7, .9), V88.0-V88.8, V89.0 | AAF = 0.18.<br>AAF source: Smith et al. (1999) <sup>14</sup>                                                                                                                                                                                                                                |
| Motor-vehicle traffic crashes                   | V02(.1, .9), V03(.1, .9), V04(.1, .9), V09.2, V12-V14(.3-.5, .9), V19.4-V19.6, V20-V28(.3-.5, .9), V29.4-V29.6, V29.8,                                                                                                     | AAF varies by sex, age group, and state, and available in the CDC Alcohol-Related Disease Impact application. <sup>16</sup> Deaths among people of all ages. A blood alcohol concentration level of 0.08 g/dL or greater is                                                                 |

|                                   |                                                                                                                                                                                                                                                                                   |                                                                                                                                      |
|-----------------------------------|-----------------------------------------------------------------------------------------------------------------------------------------------------------------------------------------------------------------------------------------------------------------------------------|--------------------------------------------------------------------------------------------------------------------------------------|
|                                   | V29.9, V30-V38(.4-.7, .9), V39 (.4-.6, .8, .9), V40-V48(.4-.7, .9), V49 (.4-.6, .8, .9), V50-V58(.4-.7, .9), V59 (.4-.6, .8, .9), V60-V68(.4-.7, .9), V69 (.4-.6, .8, .9), V70-V78(.4-.7, .9), V79 (.4-.6, .8, .9), V80.3-V80.5, V81.1, V82.1, V83-V86(.0-.3), V87.0-V87.8, V89.2 | used for defining alcohol attribution for this condition.<br>AAF source: Fatality Analysis Reporting System, 2015-2019 <sup>17</sup> |
| Occupational and machine injuries | W24-W31, W45                                                                                                                                                                                                                                                                      | AAF = 0.18.<br>AAF source: Smith et al. (1999) <sup>14</sup>                                                                         |
| Other road vehicle crashes        | V01, V05-V06, V09.1, V09.3, V09.9, V10-V11, V15-V18, V19.3, V19.8-V19.9, V80.0-V80.2, V80.6-V80.9, V81.2-V81.9, V82.2-V82.9, V87.9, V88.9, V89.1, V89.3, V89.9                                                                                                                    | AAF = 0.18.<br>AAF source: Smith et al. (1999) <sup>14</sup>                                                                         |
| Poisoning (not alcohol)           | X40-X44, X46-X49, Y10-Y14, Y16-Y19                                                                                                                                                                                                                                                | AAF = 0.29.<br>AAF source: Smith et al. (1999) <sup>14</sup>                                                                         |
| Suicide                           | X60-X64, X66-X84, Y87.0                                                                                                                                                                                                                                                           | AAF = 0.24.<br>AAF source: CDC National Violent Death Reporting System, 2015 <sup>15</sup>                                           |
| Water transport                   | V90-V94                                                                                                                                                                                                                                                                           | AAF = 0.18.<br>AAF source: Smith et al. (1999) <sup>14</sup>                                                                         |

AAF: Alcohol-attributable fraction, CDC: Centers for Disease Control and Prevention, ICD: International Classification of Diseases

<sup>a</sup> The number of alcohol-attributable deaths from conditions with a direct AAF was calculated by multiplying the total number of deaths from a particular cause by the AAF.

<sup>b</sup> Indirect AAFs vary by state as they were calculated using the state-specific prevalence of each mean daily alcohol consumption level and cause-specific relative risks that corresponded to those consumption levels. The relative risks by level of consumption and the state-specific AAFs are available in the CDC Alcohol-Related Disease Impact application.<sup>16</sup> The formula for calculating the AAF for excessive alcohol use in the Alcohol-Related Disease Impact application is as follows:

$$AAF_{Exc} = \frac{P_2(RS_2 - 1) + P_3(RS_3 - 1)}{1 + P_2(RS_2 - 1) + P_3(RS_3 - 1)}$$

Where:

$P_2$  is the prevalence of medium mean daily alcohol consumption

$P_3$  is the prevalence of high mean daily alcohol consumption

$RR_1$  is the relative risk corresponding to low mean daily alcohol consumption

$RR_2$  is the relative risk corresponding to medium mean daily alcohol consumption

$RR_3$  is the relative risk corresponding to high mean daily alcohol consumption

$RS_2 = \frac{RR_2}{RR_1}$  is the rescaled relative risk for medium mean daily alcohol consumption, using low mean daily alcohol consumption as the comparison group (following the methods of English et al.)<sup>2</sup>

$RS_3 = \frac{RR_3}{RR_1}$  is the rescaled relative risk for high mean daily alcohol consumption, using low mean daily alcohol consumption as the comparison group (following the methods of English et al.)<sup>2</sup>

**eTable 2. Adjusted Prevalence of US Mean Daily Alcohol Consumption by Level of Consumption and Age Group<sup>a</sup>**

| Characteristic                    | Level of mean daily alcohol consumption (Weighted %) |                                |                                   |                                 |
|-----------------------------------|------------------------------------------------------|--------------------------------|-----------------------------------|---------------------------------|
|                                   | Nondrinking<br>% (95% CI)                            | Low <sup>b</sup><br>% (95% CI) | Medium <sup>c</sup><br>% (95% CI) | High <sup>d</sup><br>% (95% CI) |
| <b>Total population, all ages</b> | <b>47.2 (47.1, 47.4)</b>                             | <b>35.4 (35.2, 35.5)</b>       | <b>8.6 (8.6, 8.7)</b>             | <b>8.8 (8.7, 8.8)</b>           |
| 20–64 years                       | 43.0 (42.9, 43.2)                                    | 38.2 (38.0, 38.4)              | 9.5 (9.4, 9.6)                    | 9.2 (9.1, 9.3)                  |
| 20–34 years                       | 38.6 (38.3, 38.9)                                    | 40.6 (40.3, 40.9)              | 11.0 (10.8, 11.2)                 | 9.8 (9.7, 10.0)                 |
| 35–49 years                       | 42.6 (42.3, 42.9)                                    | 39.4 (39.1, 39.7)              | 9.3 (9.1, 9.4)                    | 8.8 (8.6, 8.9)                  |
| 50–64 years                       | 47.9 (47.6, 48.2)                                    | 34.8 (34.5, 35.0)              | 8.3 (8.1, 8.4)                    | 9.1 (8.9, 9.2)                  |
| <b>Men, all ages</b>              | <b>41.2 (41.0, 41.4)</b>                             | <b>39.6 (39.4, 39.8)</b>       | <b>9.6 (9.5, 9.7)</b>             | <b>9.6 (9.5, 9.7)</b>           |
| 20–64 years                       | 37.4 (37.2, 37.7)                                    | 42.4 (42.0, 42.4)              | 10.2 (10.1, 10.4)                 | 10.1 (10.0, 10.3)               |
| 20–34 years                       | 33.2 (32.7, 33.6)                                    | 44.7 (44.3, 45.2)              | 11.7 (11.4, 12.0)                 | 10.5 (10.2, 10.7)               |
| 35–49 years                       | 36.8 (36.4, 37.3)                                    | 43.4 (42.9, 43.8)              | 10.0 (9.7, 10.2)                  | 9.8 (9.5, 10.1)                 |
| 50–64 years                       | 42.5 (42.1, 42.8)                                    | 38.5 (38.1, 38.8)              | 8.9 (8.7, 9.1)                    | 10.1 (9.9, 10.4)                |
| <b>Women, all ages</b>            | <b>52.9 (52.7, 53.1)</b>                             | <b>31.4 (31.2, 31.6)</b>       | <b>7.7 (7.6, 7.8)</b>             | <b>8.0 (7.9, 8.1)</b>           |
| 20–64 years                       | 48.5 (48.3, 48.7)                                    | 34.3 (34.1, 34.5)              | 8.8 (8.7, 8.9)                    | 8.3 (8.2, 8.5)                  |
| 20–34 years                       | 44.1 (43.7, 44.6)                                    | 36.3 (35.9, 36.8)              | 10.3 (10.0, 10.6)                 | 9.2 (9.0, 9.5)                  |
| 35–49 years                       | 48.3 (47.8, 48.7)                                    | 35.5 (35.1, 35.9)              | 8.6 (8.3, 8.8)                    | 7.7 (7.5, 7.9)                  |
| 50–64 years                       | 52.9 (52.6, 53.3)                                    | 31.4 (31.0, 31.7)              | 7.6 (7.5, 7.8)                    | 8.1 (7.9, 8.2)                  |

CI: Confidence interval

<sup>a</sup> Weighted prevalence estimates are calculated among each subgroup (e.g., men or women) because this is the basis for applying prevalence estimates to the alcohol-attributable fraction formula, which is used for calculating alcohol-attributable deaths. Self-reported mean daily alcohol consumption from the 2015–2019 Behavioral Risk Factor Surveillance System was adjusted to account for 73% of per capita alcohol sales.

<sup>b</sup> Consumed a daily mean of >0–1 drink of alcohol (women) or >0–2 drinks (men).

<sup>c</sup> Consumed a daily mean of >1–2 drinks of alcohol (women) or >2–4 drinks (men).

<sup>d</sup> Consumed a daily mean of >2 drinks of alcohol (women) or >4 drinks (men).

## eReferences

1. Parrish KM, Dufour MC, Stinson FS, Harford TC. Average daily alcohol consumption during adult life among decedents with and without cirrhosis: the 1986 National Mortality Followback Survey. *J Stud Alcohol*. 1993;54(4):450-456. doi:10.15288/jsa.1993.54.450
2. English D, Holman C, Milne E, et al. *The Quantification of Drug Caused Morbidity and Mortality in Australia*. 1995.
3. Samokhvalov AV, Irving HM, Rehm J. Alcohol consumption as a risk factor for atrial fibrillation: a systematic review and meta-analysis. *Eur J Cardiovasc Prev Rehabil*. 2010;17(6):706-712. doi:10.1097/HJR.0b013e32833a1947
4. Bagnardi V, Rota M, Botteri E, et al. Alcohol consumption and site-specific cancer risk: a comprehensive dose-response meta-analysis. *Br J Cancer*. 2015;112(3):580-593. doi:10.1038/bjc.2014.579
5. Corrao G, Bagnardi V, Zambon A, Arico S. Exploring the dose-response relationship between alcohol consumption and the risk of several alcohol-related conditions: a meta-analysis. *Addiction*. 1999;94(10):1551-1573. doi:10.1046/j.1360-0443.1999.9410155111.x
6. Zhao J, Stockwell T, Roemer A, Naimi T, Chikritzhs T. Alcohol consumption and mortality from coronary heart disease: an updated meta-analysis of cohort studies. *J Stud Alcohol Drugs*. 2017;78(3):375-386. doi:10.15288/jsad.2017.78.375
7. Taylor B, Irving HM, Baliunas D, et al. Alcohol and hypertension: gender differences in dose-response relationships determined through systematic review and meta-analysis. *Addiction*. 2009;104(12):1981-1990. doi:10.1111/j.1360-0443.2009.02694.x
8. Patra J, Bakker R, Irving H, Jaddoe VW, Malini S, Rehm J. Dose-response relationship between alcohol consumption before and during pregnancy and the risks of low birthweight,

preterm birth and small for gestational age (SGA)-a systematic review and meta-analyses. *BJOG*. 2011;118(12):1411-1421. doi:10.1111/j.1471-0528.2011.03050.x

9. Alsamarrai A, Das SL, Windsor JA, Petrov MS. Factors that affect risk for pancreatic disease in the general population: a systematic review and meta-analysis of prospective cohort studies. *Clin Gastroenterol Hepatol*. 2014;12(10):1635-1644. doi:10.1016/j.cgh.2014.01.038

10. Corrao G, Bagnardi V, Zambon A, La Vecchia C. A meta-analysis of alcohol consumption and the risk of 15 diseases. *Prev Med*. 2004;38:613-619. doi:10.1016/j.ypmed.2003.11.027

11. Samokhvalov AV, Irving HM, Rehm J. Alcohol consumption as a risk factor for pneumonia: a systematic review and meta-analysis. *Epidemiol Infect*. 2010;138(12):1789-1795. doi:10.1017/S0950268810000774

12. Patra J, Taylor B, Irving H, et al. Alcohol consumption and the risk of morbidity and mortality for different stroke types--a systematic review and meta-analysis. *BMC Public Health*. 2010;10:258. doi:10.1186/1471-2458-10-258

13. Samokhvalov AV, Irving H, Mohapatra S, Rehm J. Alcohol consumption, unprovoked seizures, and epilepsy: a systematic review and meta-analysis. *Epilepsia*. Jul 2010;51(7):1177-1184. doi:10.1111/j.1528-1167.2009.02426.x

14. Smith GS, Branas CC, Miller TR. Fatal nontraffic injuries involving alcohol: A metaanalysis. *Ann Emerg Med*. Jun 1999;33(6):659-668. doi:10.1016/S0749-3797(18)31070-5

15. Centers for Disease Control and Prevention. National Violent Death Reporting System (NVDRS). Accessed August 25, 2022.

<https://www.cdc.gov/violenceprevention/datasources/nvdrs/index.html>



16. Centers for Disease Control and Prevention. Alcohol-Related Disease Impact (ARDI) application. Accessed August 25, 2022. <https://www.cdc.gov/ardi>
17. National Highway Traffic Safety Administration. Fatality Analysis Reporting System (FARS). Accessed August 25, 2022. <https://www.nhtsa.gov/research-data/fatality-analysis-reporting-system-fars>
